# Supplementary material for: Serotonin Modulates AhR Activation by Interfering with CYP1A1-Mediated Clearance of AhR Ligands
Source: PubMed Central journal article supplement (PMC7050772; doi:10.33594/000000209), 2020-02-05
Supplement: NIHMS1558865-supplement-Supplemental_material.pdf [file NIHMS1558865-supplement-Supplemental_material.pdf]

## **Supplemental Material**

# **Serotonin Modulates AhR Activation by Interfering with CYP1A1-Mediated Clearance of AhR Ligands**

Christopher R. Manzella<sup>a</sup> Max Ackerman<sup>b</sup> Megha Singhal<sup>b</sup> Alexander L. Ticho<sup>a</sup> Justin Ceh<sup>b</sup>  
Waddah A. Alrefai<sup>b,c</sup> Seema Saksena<sup>b,c</sup> Pradeep K. Dudeja<sup>b,c</sup>  
Ravinder K. Gill<sup>b</sup>

<sup>a</sup>Department of Physiology & Biophysics, University of Illinois at Chicago, Chicago, IL, USA, <sup>b</sup>Division of Gastroenterology & Hepatology, University of Illinois at Chicago, Chicago, IL, USA, <sup>c</sup>Jesse Brown VA Medical Center, Chicago, IL, USA

## Supplemental Information

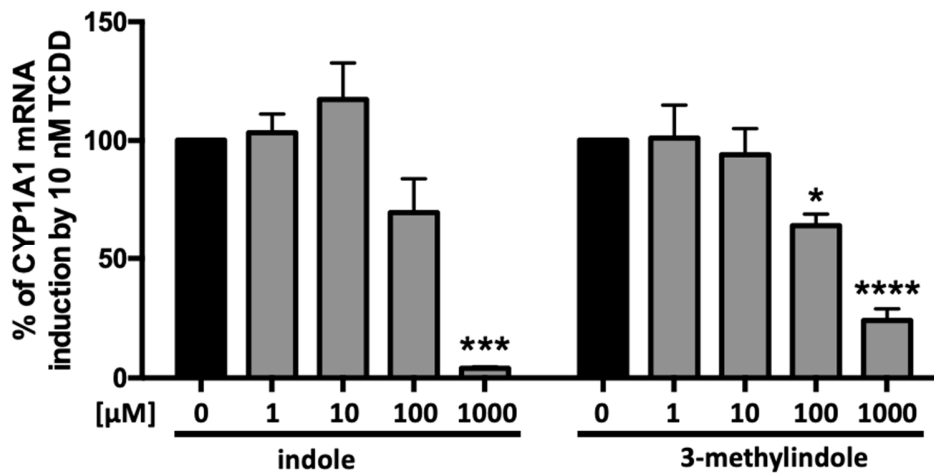

**Figure S1: Tryptophan-derived partial AhR agonists block CYP1A1 induction by TCDD.**

Caco-2 cells were plated at low density and allowed to differentiate for 10-14 d in medium containing 10% serum before treatments were performed. Cells were treated with vehicle, indole, or 3-methylindole (both 1 – 1000  $\mu\text{M}$ ) in the presence of 10 nM TCDD in serum-free and TRP-free medium. Results expressed as percentage *CYP1A1* mRNA induction without indole or 3-methylindole. *CYP1A1* mRNA was quantified by qPCR. Data analyzed by 1-way ANOVA followed by Dunnett's multiple comparisons test. \* $P < 0.05$ , \*\*\* $P < 0.001$ , \*\*\*\* $P < 0.0001$  as compared to cells treated in the absence of indole or 3-methylindole.

**Table S1:** Gene-specific primers used for Real-Time RT-PCR.

| <b>Gene</b>   | <b>Species</b> | <b>Accession No.</b> | <b>Primer sequence (5'3')</b>                                    |
|---------------|----------------|----------------------|------------------------------------------------------------------|
| <i>CYP1A1</i> | Human          | NM_000499            | F: TCGGCCACGGAGTTTCTTC<br>R: GGTCAGCATGTGCCCAATCA                |
| <i>GAPDH</i>  | Human          | NM_001101.3          | F: GAAATCCCATCACCATCTTCC<br>R: AAATGAGCCCCAGCCTTCT               |
| <i>CYP1B1</i> | Human          | NM_000104            | F:<br>TGCCTGTCACTATTCCTCATGCCA<br>R:<br>ATCAAAGTTCTCCGGGTTAGGCCA |
| <i>Cyp1a1</i> | Mouse          | NM_001136059         | F: GGGTTTGACACAGTCACAAC<br>R: GGGACGAAGGATGAATGCCG               |
| <i>Gapdh</i>  | Mouse          | NM_008084            | F: TGTGTCCGTCGTGGATCTGA<br>R: CCTGCTTACCACCTTCTTGAT              |

**Table S2:** LC method 1.

| <b>Time (min)</b> | <b>A (%)</b> | <b>B (%)</b> |
|-------------------|--------------|--------------|
| -3                | 97           | 3            |
| 0                 | 97           | 3            |
| 0.5               | 97           | 3            |
| 1                 | 70           | 30           |
| 2                 | 40           | 60           |
| 2.25              | 40           | 60           |
| 2.5               | 97           | 3            |

**Table S3:** LC method 2.

| <b>Time (min)</b> | <b>A (%)</b> | <b>B (%)</b> |
|-------------------|--------------|--------------|
| -3                | 97           | 3            |
| 0                 | 97           | 3            |
| 0.5               | 97           | 3            |
| 1                 | 70           | 30           |
| 2                 | 40           | 60           |
| 3                 | 40           | 60           |
| 3.3               | 5            | 95           |
| 5                 | 5            | 95           |
| 5.2               | 97           | 3            |
| 6                 | 97           | 3            |

**Table S4:** LC method 3.

| <b>Time (min)</b> | <b>A (%)</b> | <b>B (%)</b> |
|-------------------|--------------|--------------|
| -2.5              | 50           | 50           |
| 0                 | 50           | 50           |
| 1.5               | 0            | 100          |
| 3.5               | 0            | 100          |
| 3.7               | 50           | 50           |

**Table S5:** MRM parameters for LC-MS/MS measurements.

| <b>Analyte</b>             | <b>Q1 mass (<i>m/z</i>)</b> | <b>Q3 mass (<i>m/z</i>)</b> | <b>DP (V)</b> | <b>CE (V)</b> |
|----------------------------|-----------------------------|-----------------------------|---------------|---------------|
| L-tryptophan               | 205                         | 118                         | 57            | 36            |
| L-tryptophan               | 205                         | 188                         | 57            | 14            |
| serotonin                  | 177                         | 160                         | 54            | 16            |
| serotonin                  | 177                         | 115                         | 54            | 37            |
| 5-hydroxyindoleacetic acid | 192                         | 146                         | 18            | 28            |
| FICZ                       | 284                         | 255                         | -148          | -34           |
